# Supplementary material
Source: Springer Nature journal article supplement (https://www.springermedizin.de/resource/supplementary/12943_2013_1223_MOESM9_ESM.pdf/9552382)

Zhang\_Figure 8

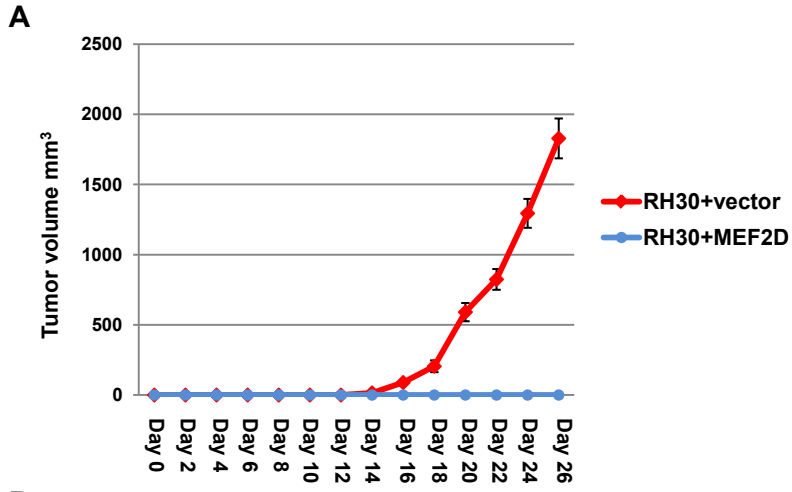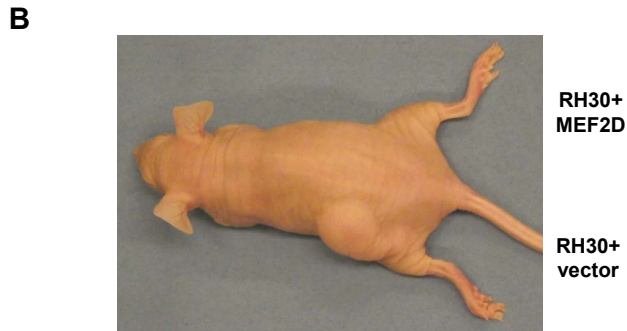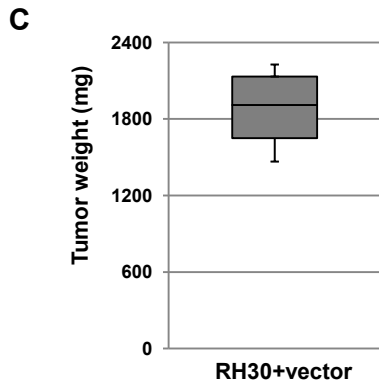

Supplement: MOESM9 [file 9552382]
